# Supplementary material for: Simultaneous Micropatterning of Fibrous Meshes and Bioinks for the Fabrication of Living Tissue Constructs
Source: PubMed Central journal article supplement — Adv Healthc Mater. Author manuscript; Available in PMC 2020 Dec 18. (PMC7116487; doi:10.1002/adhm.201800418), 2018-06-17
Supplement: EMS96595-supplement-Sup_Fig_1.pdf [file EMS96595-supplement-Sup_Fig_1.pdf]

**ADVANCED  
HEALTHCARE  
MATERIALS**

Supporting Information

for *Adv. Healthcare Mater.*, DOI: 10.1002/adhm.201800418

Simultaneous Micropatterning of Fibrous Meshes and Bioinks  
for the Fabrication of Living Tissue Constructs

*Mylènede Ruijter, Alexandre Ribeiro, Inge Dokter, Miguel  
Castilho,\* and Jos Malda\**

## Supporting Information

**Title: Simultaneous Micro-Patterning of Fibrous Meshes and Bioinks for the Fabrication of Living Tissue Constructs.**

**Author(s), and Corresponding Author(s)\*: Mylène de Ruijter, Alexandre Ribeiro, Inge Dokter, Miguel Castilho, Jos Malda\***

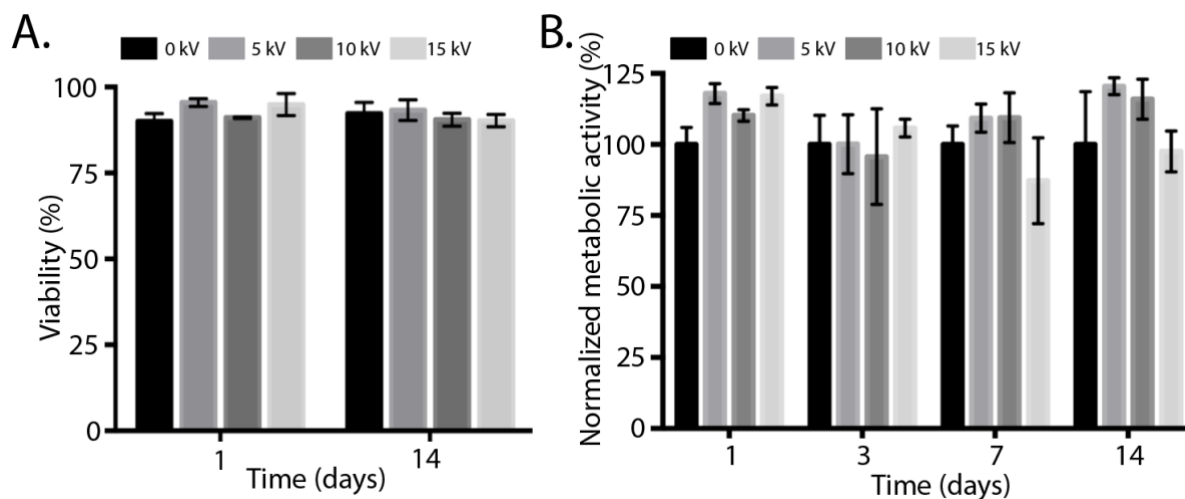

**Figure S1** Viability and metabolic activity of eMSCs in 10% gelMA after 0 – 15 kV, over the course of 21 days. No difference in viability (A) between different high voltages and the control sample where no voltage was applied. Metabolic activity in % compared to 0 kV control sample (B). Metabolic activity of samples that were subjected to high voltage was not affected.
